# Supplementary material
Source: PubMed Central journal article supplement (PMC2723805)
Supplement: NIHMS64033-supplement-1si20060427_09.pdf [file NIHMS64033-supplement-1si20060427_09.pdf]

## Supporting Information for:

### Thermodynamic Analysis of Autonomous Parallel $\beta$ -Sheet Formation in Water

John D. Fisk, Margaret A. Schmitt and Samuel H. Gellman\*

#### Synthesis:

Synthesis of **3** began with the preparation in solution of the fragment Alloc-Glu-Val-D-Pro-DADME-Fmoc, as previously described for a linear molecule related to **1**.<sup>1</sup> This fragment was attached to Rink amide resin via the Glu side chain carboxyl group, and the amino acid residues corresponding to Arg-11 through Lys-17 were appended via standard Fmoc-based solid-phase peptide synthesis on an Applied Biosystems model 432A Synergy solid phase peptide synthesizer using standard Fmoc synthesis procedures. Fmoc-amino acids were activated as HOBt esters with HBTU and DIEA. All amino acids with reactive side chains were protected. The linker unit was treated as an amino acid and coupled using the same protocol. The  $\alpha$ -amino group of Lys-17 was then coupled to the mono-2-(trimethylsilyl)ethyl ester of succinic acid (generated by using 2-(trimethylsilyl)ethanol to open succinic anhydride). The Alloc protecting group was removed with a Pd<sup>0</sup> catalyst, and the amino acid residues corresponding to Ile-6 through Gly-1 were introduced via standard methods. The Fmoc group was removed from Gly-1, fluoride was used to remove the 2-(trimethylsilyl)ethyl group from Succ-18, and cyclization was achieved on resin by treatment with standard coupling reagents (HBTU, HOBt and iPr<sub>2</sub>EtN in DMF).

**Figure A1:** Synthetic strategy employed in the construction of cyclic peptide **3**. A) Generation of monoprotected succinic acid ester. B) Structure of linker unit used in the synthesis of peptides **1** and **3**. The linker was constructed in solution via typical amide bond forming chemistry from appropriately protected amino acids. C) Abbreviations used in figure part D D) Synthetic strategy employed in the construction of cyclic peptide **3**. One letter abbreviations are used to denote amino acids. Asterisks indicated side chain protection. Normal solid phase synthesis was performed on a Applied Biosystems model 432A Synergy solid phase peptide synthesizer using standard Fmoc synthesis procedures. Fmoc-amino acids were activated as HOBt esters with HBTU and DIEA. All amino acids with reactive side chains were protected. The linker unit was treated as an amino acid and coupled using the same protocol. All peptides were synthesized using dimethoxybenzhydrylamine resin with a Rink amide handle. Coupling reactions were carried out at room temperature in DMF. All peptides were synthesized on a 25  $\mu$ mol scale, using a threefold excess of amino acid in each step. The reaction progress was monitored by solution conductivity.

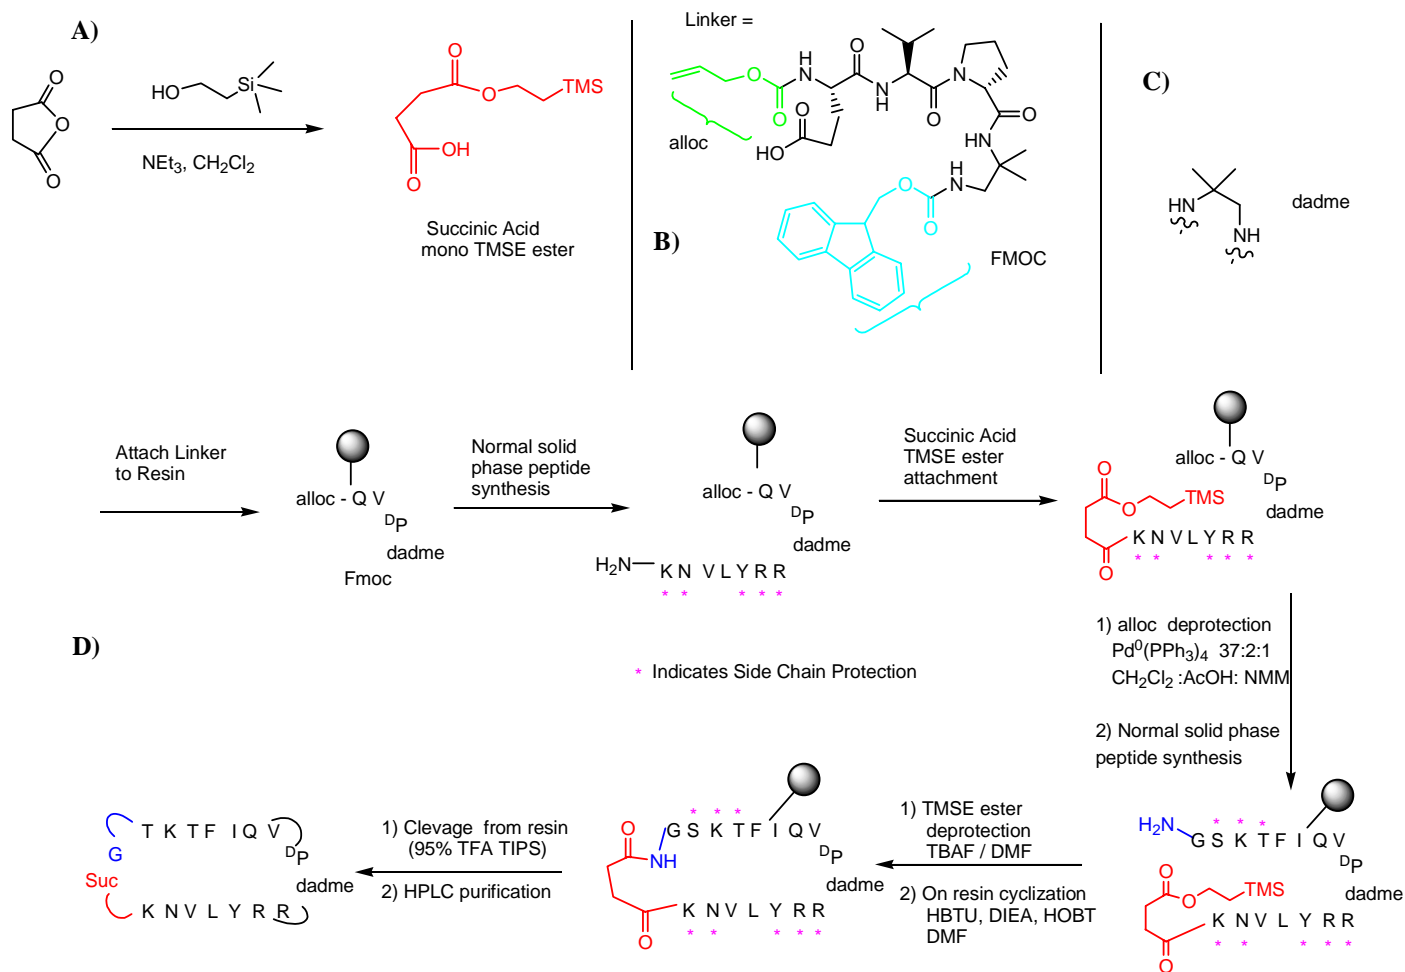

**Figure A1:** Synthetic strategy employed in the construction of cyclic peptide **3** (see previous page for caption).

### NMR Sample Preparation and Experiments:

NMR samples were prepared by dissolving lyophilized peptides in 9:1 H<sub>2</sub>O/D<sub>2</sub>O, 100 mM pH 3.8 sodium deuterioacetate buffer (buffer pH was not corrected for isotope effects). The samples often contained dust or undissolved material and were filtered using PVDF low peptide binding syringe filters (Chromacol, Trumbull, CT) directly into NMR tubes. Peptide concentrations were generally 1-3 mM, as judged by mass of material dissolved, but this concentration range should be taken as an upper limit because of material loss during the filtration. Spectroscopic determinations of concentration generally yielded values 70-80% of the concentration calculated based on mass. Samples were prepared with total volumes of approximately 300  $\mu$ L for 3 mm tubes and 600  $\mu$ L for 5 mm NMR tubes. Trace amounts of 2,2-dimethyl-2-silapentane-5-sulfonate (DSS; Merck, Rahway, NJ) were added to samples as an internal reference. The NMR samples were stable in solution for weeks to months showing no apparent precipitation of peptide or decrease in NMR signal strength over the entire period of study. In all cases sharp lines were observed in 1D spectra indicating that the peptides were not aggregated in solution.

NMR experiments were performed on a Varian INOVA 500 and 600 MHz spectrometers between set temperatures of 275 K and 354 K using 3 mm or 5 mm probes:

#### Inova 600 probes

Varian 3 mm <sup>1</sup>H/<sup>13</sup>C/<sup>15</sup>N with 3-axis PFG

Varian 5 mm <sup>1</sup>H/<sup>13</sup>C/<sup>15</sup>N with 3-axis PFG

Varian 5 mm <sup>1</sup>H/<sup>31</sup>P/X broad band with z-axis PFG

#### Inova 500 probes:

Nalorac 3 mm inverse <sup>1</sup>H/<sup>13</sup>C/<sup>15</sup>N with 3-axis PFG

Varian 5 mm inverse <sup>1</sup>H/<sup>13</sup>C/X with z-axis PFG

The probe thermocouple temperatures were calibrated with methanol and ethylene glycol chemical shift thermometers. Chemical shift measurements were performed at 5 K intervals set via the probe thermocouple and the reported temperatures were derived from the thermocouple calibration. The reported temperatures are presumed to be accurate to ~ 1 K. Solvent suppression was achieved by 0.6-1.5 second solvent presaturation during the relaxation delay. Watergate solvent suppression as implemented in Varian's Protein Pack suite of experiments was used instead of presaturation in some NOESY and TOCSY experiments. Spectral windows of 5500 Hz (500 MHz spectrometer) or 6600 (600 MHz spectrometer) were used. Standard Varian pulse sequences were used, and data were processed using Varian VNMR 6.1 software and analyzed with XEASY<sup>2</sup> or Sparky<sup>3</sup> programs. Shifted sin bell window functions were generally applied before fourier transformation. For all samples GCOSY spectra were obtained in absolute value mode with gradient echo coherence

selection; TOCSY,<sup>4</sup> NOESY,<sup>5</sup> and ROESY<sup>4,6</sup> spectra were acquired in the phase-sensitive mode with hypercomplex phase cycling (States-Haberkorn method). All experiments were performed by collecting 2048 points in f2 and 300-600 points in f1. TOCSY experiments employed a standard MLEV-17 spin lock sequence with a spin lock field of 7-8 kHz and mixing time of 80 ms. ROESY experiments used spinlocking fields of 3 kHz and 200-250 ms mixing times. NOESY spectra utilized mixing times of 200-300 ms. The <sup>1</sup>H chemical shift assignment of the peptides was achieved by the sequential assignment procedure.<sup>7</sup> NOEs / ROEs were characterized as strong, medium or weak based on visual comparison to either the C-terminal amide cross peak or cross peaks of well resolved geminal proton pairs.

- (1) Fisk, J. D.; Gellman, S. H.; *J. Am. Chem. Soc.*, **2001**; *123*, 343.
- (2) Bartels, C.; Xia, T. H.; Billeter, M.; Guntert, P.; Wuthrich, K.; *J. Biomol. Nmr* **1995**, *6*, 1-10.
- (3) Goddard, D. T.; Kneller, D. G. SPARKY 3, University of California, San Francisco.
- (4) Bax, A.; Davis, D. G.; *J. Mag. Res.*, **1985**; *65*, 355.
- (5) Jeener, J. M., B.H.; Bachmann, P.; Ernst, R. R.; *J. Chem. Phy.* **1979**, *29*, 1012-1014.
- (6) Bothner-By, A. A.; Stephens, R. L.; Lee, J.; Warren, C. D.; Jeanloz, R. W.; *J. Am. Chem. Soc.*, **1984**; *106*, 811-813.
- (7) Wuthrich, K.; *NMR of Proteins and Nucleic Acids*; Wiley-Interscience: New York, 1986.

Table A.1: Proton resonances (ppm relative to DSS) for **1**:**Ac-SKTFIQV-<sup>D</sup>P-dadme-RRYLVNK-ac**(~2 mM in 9:1 H<sub>2</sub>O:D<sub>2</sub>O pH 3.8, 100 mM AcOD at 275K)

| Residue            | N-H            | H $\alpha$ | H $\beta$    | Others                                                                       |
|--------------------|----------------|------------|--------------|------------------------------------------------------------------------------|
| Ac-1               | -              | -          | -            | CH <sub>3</sub> 2.040                                                        |
| Ser-2              | 8.456          | 4.380      | 3.831        | -                                                                            |
| Lys-3              | 8.558          | 4.444      | 1.595        | $\gamma$ 1.326, 1.420<br>$\delta$ 1.660<br>$\epsilon$ 2.966<br>$\zeta$ 7.629 |
| Thr-4              | 8.203          | 4.337      | 3.935        | $\gamma$ 1.117                                                               |
| Phe-5              | 8.308          | 4.957      | 2.850        | $\delta$ 7.037<br>$\epsilon$ 7.267<br>$\zeta$ 7.221                          |
| Ile-6              | 8.623          | 4.172      | 1.616        | $\gamma_2$ 0.8886<br>$\gamma_1$ 1.050, 1.345<br>$\delta$ 0.7557              |
| Gln-7              | 8.850          | 4.774      | 2.039, 2.054 | $\gamma$ 2.140, 2.303<br>$\epsilon$ 7.057, 7.563                             |
| Val-8              | 8.854          | 4.599      | 2.040        | $\gamma$ 0.9135, 0.9468                                                      |
| <sup>D</sup> Pro-9 |                | 4.296      | 1.941, 2.279 | $\gamma$ 2.006, 2.132<br>$\delta$ 3.753, 3.879                               |
| Dadme-10           | 7.969<br>8.036 |            |              | Me 1.167, 1.311<br>CH <sub>2</sub> 3.529, 3.578                              |
| Arg-11             | 8.755          | 4.708      | 1.820        | $\gamma$ 1.609, 1.745<br>$\delta$ 3.234<br>$\epsilon$ 7.319<br>$\eta$        |
| Arg-12             | 8.816          | 4.541      | 1.564, 1.701 | $\gamma$ 1.432<br>$\delta$ 2.899<br>$\epsilon$ 7.050<br>$\eta$               |
| Tyr-13             | 8.396          | 5.170      | 2.844, 2.914 | $\delta$ 7.056<br>$\epsilon$ 6.723                                           |
| Leu-14             | 8.336          | 4.431      | 1.416        | $\gamma$ 1.454<br>$\delta$ 0.8170, 0.8182                                    |
| Val-15             | 7.900          | 4.105      | 1.868        | $\gamma$ 0.6189, 0.7780                                                      |
| Asn-16             | 8.666          | 4.692      | 2.724, 2.823 | $\delta$ 7.000, 7.691                                                        |
| Lys-17             | 8.475          | 4.333      | 1.718        | $\gamma$ 1.395, 1.444<br>$\delta$ 1.714<br>$\epsilon$ 2.965<br>$\zeta$ 7.627 |
| Ac-18              | -              | -          | -            | CH <sub>3</sub> 2.040                                                        |

Table A.2: Proton resonances (ppm relative to DSS) for **2:**  
**ac-SKTFIQV-<sup>L</sup>P-dadme-RRYLVNK-ac**  
 (~2 mM in 9:1 H<sub>2</sub>O:D<sub>2</sub>O pH 3.8, 100 mM AcOD at 275 K)

| Residue             | N-H   | H $\alpha$ | H $\beta$    | Others                                                                       |
|---------------------|-------|------------|--------------|------------------------------------------------------------------------------|
| Ac-1                | -     | -          | -            | CH <sub>3</sub> 2.104                                                        |
| Ser -2              | 8.460 | 4.391      | 3.842        |                                                                              |
| Lys -3              | 8.645 | 4.396      | 1.728 1.826  | $\gamma$ 1.383, 1.437<br>$\delta$ 1.668<br>$\epsilon$ 2.971<br>$\zeta$ 7.619 |
| Thr -4              | 8.180 | 4.266      | 4.091        | $\gamma$ 1.138                                                               |
| Phe-5               | 8.424 | 4.634      | 3.016 3.056  | $\delta$ 7.202<br>$\epsilon$ 7.312<br>$\zeta$ 7.270                          |
| Ile-6               | 8.158 | 4.052      | 1.722        | $\gamma_2$ 1.113<br>$\gamma_1$ 1.410, 1.455<br>$\delta$ 0.8229               |
| Gln-7               | 8.536 | 4.273      | 1.918 1.964  | $\gamma$ 2.241, 2.307<br>$\epsilon$ 6.902 7.574                              |
| Val-8               | 8.466 | 4.394      | 2.095        | $\gamma$ 0.9747, 1.006                                                       |
| <sup>D</sup> Pro- 9 |       | 4.283      | 1.889, 2.240 | $\gamma$ 1.941, 2.047<br>$\delta$ 3.668, 3.890                               |
| Dadme -10           | 8.168 |            |              | 3.471, 3.498                                                                 |
| Arg 11              | 8.198 | 4.247      | 1.732        | $\gamma$ 1.514, 1.653<br>$\delta$ 3.147<br>$\epsilon$ 7.226<br>$\eta$        |
| Arg-12              | 8.413 | 4.224      | 1.777        | $\gamma$ 1.599, 1.678<br>$\delta$ 3.215<br>$\epsilon$ 7.297<br>$\eta$        |
| Tyr-13              | 8.262 | 4.540      | 2.968        | $\delta$ 7.084<br>$\epsilon$ 6.795                                           |
| Leu-14              | 8.347 | 4.311      | 1.546        | $\gamma$ 1.437<br>$\delta$ 0.8264 0.8976                                     |
| Val-15              | 8.105 | 4.031      | 2.022        | $\gamma$ 0.8212, 0.8842                                                      |
| Asn-16              | 8.659 | 4.692      | 2.736, 2.815 | $\delta$ 6.949 7.658                                                         |
| Lys-17              | 8.463 | 4.216      | 1.718 1.784  | $\gamma$ 1.400, 1.431<br>$\delta$ 1.667<br>$\epsilon$ 2.975<br>$\zeta$ 7.624 |
| Ac-18               | -     | -          | -            | CH <sub>3</sub> 2.103                                                        |

Table A.3: Proton resonances (ppm relative to DSS) for **3**:  
**c(G-SKTFIQV-<sup>D</sup>P-dadme-RRYLVNK-suc)**  
 (~2 mM in 9:1 H<sub>2</sub>O:D<sub>2</sub>O pH 3.8, 100 mM AcOD at 275 K)

| Residue             | N-H   | H $\alpha$   | H $\beta$    | Others                                                                       |
|---------------------|-------|--------------|--------------|------------------------------------------------------------------------------|
| Gly-1               | 8.569 | 4.008, 4.051 | -            |                                                                              |
| Ser -2              | 8.331 | 4.547        | 3.868        | -                                                                            |
| Lys -3              | 8.606 | 4.621        | 1.563        | $\gamma$ 1.202, 1.339<br>$\delta$ 1.630<br>$\epsilon$ 2.944<br>$\zeta$       |
| Thr -4              | 8.048 | 4.375        | 3.937        | $\gamma$ 1.099                                                               |
| Phe-5               | 8.592 | 5.272        | 2.717, 2.810 | $\delta$ 7.029<br>$\epsilon$ 7.243<br>$\zeta$ 7.254                          |
| Ile-6               | 8.827 | 4.211        | 1.487        | $\gamma$ 0.9032<br>$\gamma$ 0.975, 1.247<br>$\delta$ 0.716                   |
| Gln-7               | 8.938 | 4.878        | 2.021, 2.070 | $\gamma$ 2.112, 2.308<br>$\epsilon$ 7.001, 7.574                             |
| Val-8               | 9.002 | 4.628        | 2.060        | $\gamma$ 0.9267, 1.005                                                       |
| <sup>D</sup> Pro- 9 |       | 4.304        | 1.936, 2.289 | $\gamma$ 2.009, 2.154<br>$\delta$ 3.735, 3.903                               |
| Dadme -10           | 7.907 |              |              | 3.499, 3.628<br>1.164, 1.319                                                 |
| Arg 11              | 8.871 | 4.798        | 1.828        | $\gamma$ 1.615, 1.769<br>$\delta$ 3.236<br>$\epsilon$ 7.313<br>$\eta$        |
| Arg-12              | 8.981 | 4.681        | 1.592, 1.723 | $\gamma$ 1.468<br>$\delta$ 2.921<br>$\epsilon$ 7.048<br>$\eta$               |
| Tyr-13              | 8.634 | 5.324        | 2.827, 2.831 | $\delta$ 7.061<br>$\epsilon$ 6.728                                           |
| Leu-14              | 8.379 | 4.525        | 1.288        | $\gamma$ 1.450<br>$\delta$ 0.728, 0.834                                      |
| Val-15              | 8.162 | 4.164        | 1.776        | $\gamma$ 0.4990, 0.7362                                                      |
| Asn-16              | 8.261 | 4.775        | 2.628, 2.655 | $\delta$ 7.061, 7.541                                                        |
| Lys-17              | 8.488 | 4.344        | 1.732        | $\gamma$ 1.283, 1.363<br>$\delta$ 1.634<br>$\epsilon$ 2.936<br>$\zeta$ 7.584 |
| Suc-18              | -     | -            | -            | CH <sub>2</sub><br>CH <sub>2</sub>                                           |

| <b>Table A4</b> Selected NOEs observed for <b>1</b> in aqueous solution<br>(100 mM Acetic Acid buffer, pH 3.8, 275 K) |               |                |               |                      |
|-----------------------------------------------------------------------------------------------------------------------|---------------|----------------|---------------|----------------------|
| <b>Residue</b>                                                                                                        | <b>H-atom</b> | <b>Residue</b> | <b>H-atom</b> | <b>NOE Intensity</b> |
| Ser 2                                                                                                                 | H $\alpha$    | Asn 16         | HN            | weak                 |
| Lys 3                                                                                                                 | H $\delta$    | Phe 5          | H $\epsilon$  | weak                 |
| Thr 4                                                                                                                 | H $\alpha$    | Tyr 13         | H $\delta$    | weak                 |
|                                                                                                                       | HN            | Val 15         | H $\alpha$    | weak                 |
| Phe 5                                                                                                                 | H $\epsilon$  | Arg 12         | H $\gamma$    | weak                 |
|                                                                                                                       | H $\alpha$    | Leu 14         | HN            | weak                 |
|                                                                                                                       | H $\epsilon$  | Leu 14         | H $\delta$    | weak                 |
|                                                                                                                       | H $\zeta$     | Leu 14         | H $\delta$    | weak                 |
| Ile 6                                                                                                                 | H $\beta$     | Tyr 13         | H $\delta$    | medium               |
|                                                                                                                       | H $\beta$     | Tyr 13         | H $\epsilon$  | weak                 |
|                                                                                                                       | H $\gamma$    | Tyr 13         | H $\delta$    | medium               |
|                                                                                                                       | H $\gamma$    | Tyr 13         | H $\epsilon$  | medium               |
|                                                                                                                       | H $\delta$    | Tyr 13         | H $\epsilon$  | medium               |
|                                                                                                                       | HN            | Tyr 13         | H $\alpha$    | weak                 |
| Gln 7                                                                                                                 | H $\alpha$    | Arg 12         | HN            | weak                 |
|                                                                                                                       | H $\alpha$    | Arg 12         | H $\beta$     | weak                 |
| Val 8                                                                                                                 | HN            | Arg 11         | H $\alpha$    | weak                 |
|                                                                                                                       | H $\gamma$    | Tyr 13         | H $\delta$    | medium               |
|                                                                                                                       | H $\gamma$    | Tyr 13         | H $\epsilon$  | medium               |
| Tyr 13                                                                                                                | H $\delta$    | Val 15         | H $\gamma$    | weak                 |
|                                                                                                                       | H $\epsilon$  | Val 15         | H $\beta$     | weak                 |
|                                                                                                                       | H $\epsilon$  | Val 15         | H $\gamma$    | weak                 |
|                                                                                                                       | HN            | Val 15         | H $\gamma$    | weak                 |

| <b>Table A5</b> Selected NOEs observed for <b>3</b> in aqueous solution<br>(100 mM Acetic Acid buffer, pH 3.8, 297 K) |               |                |               |                      |
|-----------------------------------------------------------------------------------------------------------------------|---------------|----------------|---------------|----------------------|
| <b>Residue</b>                                                                                                        | <b>H-atom</b> | <b>Residue</b> | <b>H-atom</b> | <b>NOE Intensity</b> |
| Ser 2                                                                                                                 | H $\alpha$    | Asn 16         | H $\beta$     | weak                 |
|                                                                                                                       | H $\beta$     | Lys 17         | H $\alpha$    | weak                 |
|                                                                                                                       | HN            | Gly 1          | HN            | weak                 |
| Lys 3                                                                                                                 | H $\alpha$    | Asn 16         | H $\beta$     | weak                 |
|                                                                                                                       | HN            | Leu 14         | H $\alpha$    | weak                 |
| Thr 4                                                                                                                 | H $\gamma$    | Tyr 13         | H $\delta$    | weak                 |
|                                                                                                                       | H $\gamma$    | Tyr 13         | H $\epsilon$  | weak                 |
|                                                                                                                       | H $\beta$     | Val 15         | H $\alpha$    | weak                 |
|                                                                                                                       | HN            | Val 15         | H $\gamma$    | weak                 |
|                                                                                                                       |               | Val15          | H $\alpha$    | weak                 |
| Phe 5                                                                                                                 | H $\delta$    |                |               |                      |
|                                                                                                                       | H $\delta$    | Lys 3          | H $\delta$    | weak                 |
|                                                                                                                       | H $\epsilon$  | Lys 3          | H $\epsilon$  | weak                 |
|                                                                                                                       | H $\delta$    | Lys 3          | H $\delta$    | medium               |
|                                                                                                                       | H $\delta$    | Leu 14         | H $\beta$     | medium               |
|                                                                                                                       | H $\epsilon$  | Leu 14         | H $\gamma$    | medium               |
|                                                                                                                       | H $\epsilon$  | Leu 14         | H $\beta$     | weak                 |
|                                                                                                                       | H $\epsilon$  | Leu 14         | H $\gamma$    | medium               |
|                                                                                                                       | H $\zeta$     | Leu 14         | H $\delta$    | medium               |
|                                                                                                                       | H $\zeta$     | Leu 14         | H $\gamma$    | weak                 |
|                                                                                                                       | H $\alpha$    | Leu 14         | H $\delta$    | medium               |
|                                                                                                                       |               | Leu 14         | HN            | weak                 |
| Ile 6                                                                                                                 | H $\beta$     |                |               |                      |
|                                                                                                                       | H $\beta$     | Tyr 13         | H $\delta$    | medium               |
|                                                                                                                       | H $\gamma$ 1  | Tyr 13         | H $\epsilon$  | medium               |
|                                                                                                                       | H $\gamma$ 2  | Tyr 13         | H $\epsilon$  | weak                 |
|                                                                                                                       | H $\gamma$ 2  | Tyr 13         | H $\delta$    | medium               |
|                                                                                                                       | H $\delta$    | Tyr 13         | H $\epsilon$  | medium               |
|                                                                                                                       | HN            | Tyr 13         | H $\epsilon$  | medium               |
| Gln 7                                                                                                                 |               |                |               |                      |
|                                                                                                                       | H $\alpha$    | Arg 12         | HN            | weak                 |
|                                                                                                                       | H $\beta$     | Arg 11         | H $\alpha$    | weak                 |
|                                                                                                                       | H $\gamma$    | Pro 9          | H $\delta$    | weak                 |
|                                                                                                                       | H $\beta$     | Arg 12         | HN            | weak                 |
| Val 8                                                                                                                 | HN            |                |               |                      |
|                                                                                                                       | H $\beta$     | Arg 11         | H $\alpha$    | weak                 |
|                                                                                                                       | H $\beta$     | Tyr 13         | H $\delta$    | weak                 |
|                                                                                                                       | H $\gamma$    | Tyr 13         | H $\epsilon$  | weak                 |

|        |                                          |                                      |                                                    |                              |
|--------|------------------------------------------|--------------------------------------|----------------------------------------------------|------------------------------|
| Val 8  | H $\gamma$                               | Tyr 13<br>Tyr 13                     | H $\delta$<br>H $\epsilon$                         | strong<br>medium             |
| Tyr 13 | H $\delta$<br>H $\delta$<br>H $\epsilon$ | Val 15<br>Val 15<br>Val 15<br>Val 15 | H $\beta$<br>H $\gamma$<br>H $\beta$<br>H $\gamma$ | weak<br>weak<br>weak<br>weak |

| <b>Table A6</b> Chemical shifts of H $\alpha$ protons observed for <b>3</b> in aqueous solution with different proportions of TFE (100 mM Acetic Acid buffer / X % TFE, pH 3.8, 287 K) |        |         |         |         |         |
|----------------------------------------------------------------------------------------------------------------------------------------------------------------------------------------|--------|---------|---------|---------|---------|
|                                                                                                                                                                                        | 0% TFE | 15% TFE | 30% TFE | 40% TFE | 50% TFE |
| Gly 1 HA1                                                                                                                                                                              | 4.027  | 4.04    | 4.115   | 4.13    | 4.162   |
| Gly 1 HA2                                                                                                                                                                              | 3.904  | 3.891   | 3.866   | 3.858   | 3.844   |
| Ser 2                                                                                                                                                                                  | 4.558  | 4.601   | 4.661   | 4.675   | 4.678   |
| Lys 3                                                                                                                                                                                  | 4.635  | 4.714   | 4.861   | 4.886   | 4.904   |
| Thr 4                                                                                                                                                                                  | 4.367  | 4.373   | 4.421   | 4.431   | 4.449   |
| Phe 5                                                                                                                                                                                  | 5.25   | 5.285   | 5.343   | 5.346   | 5.358   |
| Ile 6                                                                                                                                                                                  | 4.213  | 4.219   | 4.257   | 4.27    | 4.27    |
| Gln 7                                                                                                                                                                                  | 4.889  | 4.959   | 4.992   | 5       | 4.992   |
| Val 8                                                                                                                                                                                  | 4.631  | 4.624   | 4.65    | 4.663   | 4.663   |
| Pro 9                                                                                                                                                                                  |        |         |         |         |         |
| Dadme 10                                                                                                                                                                               | 3.501  | 3.496   | 3.521   | 3.523   | 3.528   |
| Arg 11                                                                                                                                                                                 | 4.802  | 4.779   | 4.811   | 4.81    | 4.826   |
| Arg 12                                                                                                                                                                                 | 4.676  | 4.696   | 4.72    | 4.738   | 4.754   |
| Tyr 13                                                                                                                                                                                 | 5.323  | 5.384   | 5.434   | 5.444   | 5.456   |
| Leu 14                                                                                                                                                                                 | 4.518  | 4.537   | 4.57    | 4.577   | 4.581   |
| Val 15                                                                                                                                                                                 | 4.188  | 4.268   | 4.388   | 4.394   | 4.418   |
| Asn 16                                                                                                                                                                                 | 4.785  | 4.794   | 4.859   | 4.885   | 4.883   |
| Lys 17                                                                                                                                                                                 | 4.352  | 4.367   | 4.417   | 4.436   | 4.453   |
|                                                                                                                                                                                        |        |         |         |         |         |
|                                                                                                                                                                                        |        |         |         |         |         |

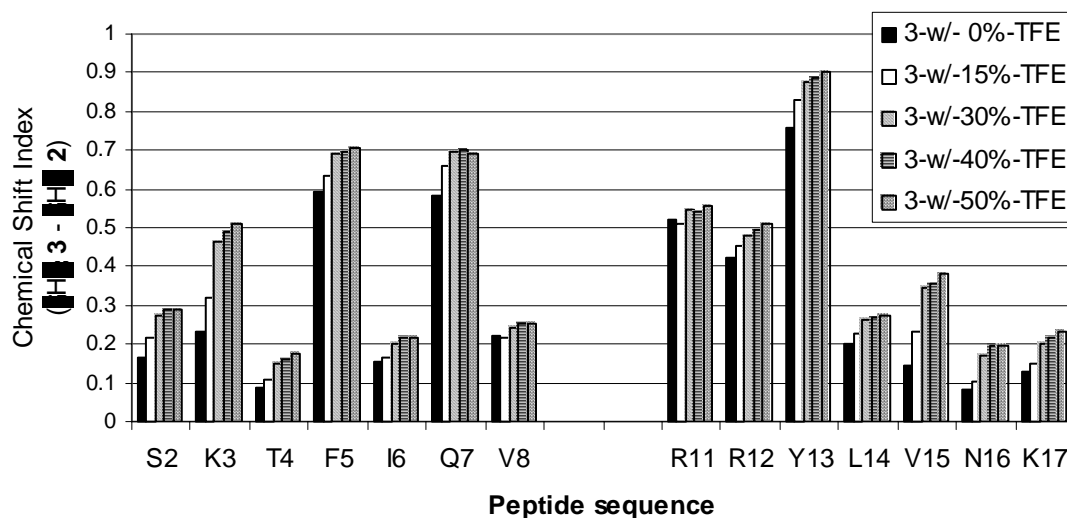

Figure A2: Effect of TFE cosolvent addition on chemical shifts in cyclic reference peptide 3 (100 mM Acetic Acid buffer / X % TFE, pH 3.8, 287 K).

**Table A7:**  $\alpha$  proton chemical shifts for **1** in aqueous solution from 275 to 354 K  
(100 mM Acetic Acid buffer, pH 3.8, 275-354 K)

| Temp<br>°K | 275.4 | 280.2 | 286.6 | 291.5 | 297.2 | 302.8 | 308.5 | 313.9 | 319.8 | 325.3 | 331.6 | 343   | 354   |
|------------|-------|-------|-------|-------|-------|-------|-------|-------|-------|-------|-------|-------|-------|
| Ser 2      | 4.376 | 4.379 | 4.382 | 4.385 | 4.387 | 4.396 | 4.398 | 4.399 | 4.403 | 4.405 | 4.407 | 4.417 | 4.376 |
| Lys 3      | 4.440 | 4.442 | 4.438 | 4.438 | 4.434 | 4.437 | 4.432 | 4.428 | 4.428 | 4.424 | 4.417 | 4.410 | 4.440 |
| Thr 4      | 4.294 | 4.295 | 4.292 | 4.291 | 4.291 | 4.292 | 4.291 | 4.288 | 4.290 | 4.288 | 4.285 | 4.275 | 4.294 |
| Phe 5      | 4.977 | 4.984 | 4.988 | 4.989 | 4.986 | 4.987 | 4.979 | 4.971 | 4.965 | 4.949 | 4.914 | 4.887 | 4.977 |
| Ile 6      | 4.165 | 4.170 | 4.174 | 4.176 | 4.176 | 4.183 | 4.182 | 4.182 | 4.184 | 4.185 | 4.188 | 4.187 | 4.165 |
| Gln 7      | 4.767 | 4.782 | 4.796 | 4.802 | 4.809 | 4.814 | 4.815 | 4.810 | 4.809 | 4.793 | 4.767 | 4.734 | 4.767 |
| Val 8      | 4.596 | 4.599 | 4.599 | 4.597 | 4.601 | 4.602 | 4.599 | 4.596 | 4.592 | 4.589 | 4.576 | 4.563 | 4.596 |
|            | 3.529 | 3.526 | 3.518 | 3.515 | 3.507 | 3.511 | 3.507 | 3.509 | 3.497 | 3.499 | 3.497 | 3.482 | 3.529 |
| Arg 11     | 4.707 | 4.712 | 4.712 | 4.714 | 4.715 | 4.712 | 4.705 | 4.697 | 4.693 | 4.681 | 4.647 | 4.619 | 4.707 |
| Arg 12     | 4.538 | 4.542 | 4.545 | 4.547 | 4.540 | 4.538 | 4.532 | 4.523 | 4.518 | 4.506 | 4.482 | 4.459 | 4.538 |
| Tyr 13     | 5.170 | 5.172 | 5.170 | 5.163 | 5.158 | 5.147 | 5.131 | 5.110 | 5.091 | 5.064 | 4.991 | 4.940 | 5.170 |
| Leu 14     | 4.432 | 4.434 | 4.433 | 4.428 | 4.425 | 4.424 | 4.420 | 4.416 | 4.408 | 4.397 | 4.381 | 4.370 | 4.432 |
| Val 15     | 4.100 | 4.108 | 4.119 | 4.125 | 4.131 | 4.137 | 4.140 | 4.141 | 4.145 | 4.141 | 4.141 | 4.141 | 4.100 |
| Asn 16     | 4.690 | 4.692 | 4.691 | 4.693 | 4.692 | 4.695 | 4.692 | 4.693 | 4.695 | 4.699 | 4.693 | 4.694 | 4.690 |
| Lys 17     | 4.225 | 4.230 | 4.230 | 4.236 | 4.240 | 4.244 | 4.246 | 4.248 | 4.252 | 4.256 | 4.262 | 4.258 | 4.225 |

**Table A8 :**  $\alpha$  proton chemical shifts for **2** in aqueous solution from 275 to 354 K  
(100 mM Acetic Acid buffer, pH 3.8, 275-354 K)

| Temp °K | 275.4 | 280.2 | 286.6 | 291.5 | 297.2 | 302.8 | 308.5 | 313.9 | 319.8 | 325.3 | 331.6 | 343   | 354   |
|---------|-------|-------|-------|-------|-------|-------|-------|-------|-------|-------|-------|-------|-------|
| Ser 2   | 4.391 | 4.4   | 4.387 | 4.392 | 4.394 | 4.398 | 4.399 | 4.403 | 4.403 | 4.409 | 4.413 | 4.414 | 4.415 |
| Lys 3   | 4.396 | 4.395 | 4.394 | 4.389 | 4.389 | 4.389 | 4.384 | 4.383 | 4.385 | 4.383 | 4.384 | 4.377 | 4.375 |
| Thr 4   | 4.266 | 4.266 | 4.272 | 4.267 | 4.271 | 4.271 | 4.268 | 4.268 | 4.27  | 4.271 | 4.269 | 4.269 | 4.26  |
| Phe 5   | 4.637 | 4.637 | 4.652 | 4.653 | 4.663 | 4.67  | 4.672 | 4.678 | 4.679 | 4.684 | 4.688 | 4.69  | 4.69  |
| Ile 6   | 4.046 | 4.043 | 4.056 | 4.074 | 4.08  | 4.093 | 4.094 | 4.107 | 4.107 | 4.12  | 4.128 | 4.14  | 4.145 |
| Gln 7   | 4.273 | 4.271 | 4.3   | 4.307 | 4.32  | 4.335 | 4.335 | 4.352 | 4.352 | 4.365 | 4.372 | 4.375 | 4.38  |
| Val 8   | 4.394 | 4.392 | 4.408 | 4.411 | 4.416 | 4.422 | 4.423 | 4.428 | 4.43  | 4.436 | 4.439 | 4.443 | 4.445 |
|         |       |       |       |       |       |       |       |       |       |       |       |       |       |
| Arg 11  | 4.251 | 4.251 | 4.267 | 4.267 | 4.277 | 4.285 | 4.286 | 4.297 | 4.297 | 4.301 | 4.306 | 4.303 | 4.309 |
| Arg 12  | 4.223 | 4.223 | 4.243 | 4.248 | 4.259 | 4.274 | 4.272 | 4.286 | 4.286 | 4.296 | 4.303 | 4.307 | 4.313 |
| Tyr 13  | 4.54  | 4.539 | 4.556 | 4.558 | 4.566 | 4.573 | 4.57  | 4.579 | 4.579 | 4.579 | 4.58  | 4.581 | 4.579 |
| Leu 14  | 4.312 | 4.31  | 4.308 | 4.305 | 4.303 | 4.301 | 4.301 | 4.298 | 4.3   | 4.296 | 4.292 | 4.295 | 4.29  |
| Val 15  | 4.031 | 4.031 | 4.036 | 4.037 | 4.044 | 4.049 | 4.048 | 4.056 | 4.055 | 4.06  | 4.062 | 4.07  | 4.071 |
| Asn 16  | 4.692 | 4.69  | 4.689 | 4.69  | 4.69  | 4.692 | 4.692 | 4.691 | 4.693 | 4.689 | 4.691 | 4.684 | 4.687 |
| Lys 17  | 4.215 | 4.214 | 4.22  | 4.22  | 4.226 | 4.23  | 4.227 | 4.236 | 4.236 | 4.238 | 4.242 | 4.249 | 4.247 |

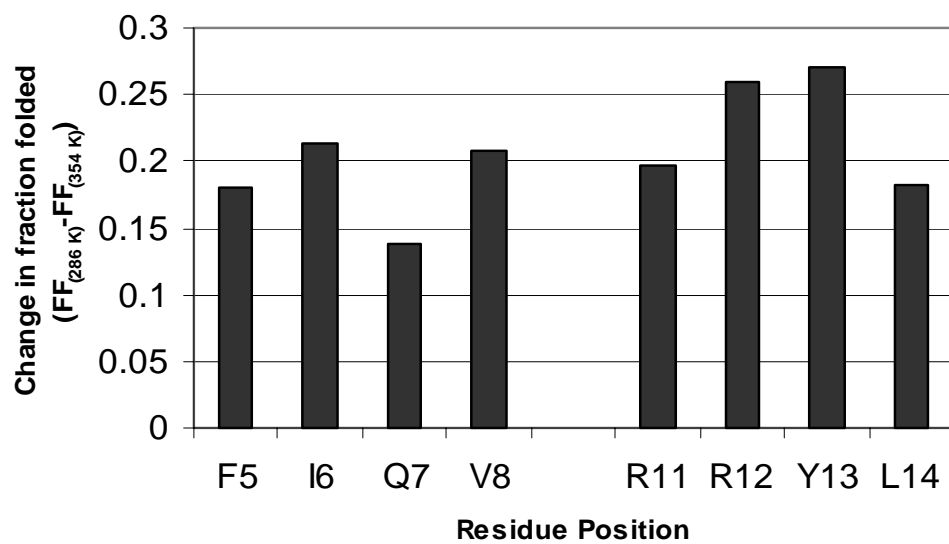

**Figure A3:**  $\beta$ -Sheet population change between 287 K and 354 K for **1** measured at core residues

### ***Van't Hoff Analysis:***

**Non-linear regression fitting of the temperature dependence of the folded population of **1** to an expression of free energy in terms of entropy, enthalpy and heat capacity.**

Thermodynamic analysis of folding was performed on **1** (using **2** and **3** as references for the fully folded and fully unfolded state) as described in Maynard, A. J.; Sharman, G. J.; Searle, M. S. *J. Am. Chem. Soc.* **1998**; *120*, 1996. The sum of the  $\alpha$  proton chemical shifts from the folded "core" region of **1** (residues F<sub>5</sub>I<sub>6</sub>Q<sub>7</sub>V<sub>8</sub>R<sub>11</sub>R<sub>12</sub>Y<sub>13</sub>L<sub>14</sub>) and the sums of the  $\alpha$  proton chemical shifts of the same residues in **2** and **3** were used to calculate a folded populations for **1** at temperatures from 275 to 354 K according to top equation in figure A4. The chemical shifts of **1** and **2** were measured at each temperature; for the 100% reference peptide **3**, data obtained at 287 K in 50% (v/v) trifluoroethanol were used. The estimated error in the determined populations due to the estimated error in chemical shift determinations of  $\pm 0.01$  ppm is  $\pm 0.01$  (i.e., populations are reported as fractions folded, from 0 to 1.00, with an error of  $\pm 0.01$ ). The estimated error in the determination of temperatures is approximately  $\pm 1$  K. The error in the population due to this error in temperature is expected to be less than the error due to chemical shift measurement because changes in temperature of 1 K generally introduced chemical shift changes that were less than 0.01 ppm. The temperature dependence of the folded population was fit to the bottom equation in Figure A4 using non-linear regression with the program Sigma Plot. The error in the thermodynamic parameters reported below is derived from the fitting.

The effect that errors in the determination of the extent of folding in the "100%" reference peptide have on the thermodynamic parameters calculated is described below. Qualitatively, if the fully folded reference peptide is less than 100% folded, but is assumed to be 100% folded for the calculations, then the thermodynamic parameters obtained would be larger than the true values. This is due to an underestimation of the true limiting value, which leads to an apparent increase in the calculated folded populations and an increase in the extent of unfolding observed over the temperature range. Figure A5 and Table A9 show fits and derived thermodynamic parameters for the van't Hoff analysis of **1** using **2** (in aq solution) and **3** (in 50% TFE at 287 K) assuming that peptide **3** is either 80%, 90%, or 100% folded. The curve in blue shows the data and fit if **3** is really 100% folded. The curve in red shows the corrected data and fit if the fully folded reference is really only 90% folded (made by multiplying the limiting value by 10/9). The curve in black shows the corrected data and fit if the fully folded reference is really only 80% folded (made by multiplying the limiting value by 10/8). The values obtained from these fits are all similar.

The effect of using different subsets of residues to determine folded population and thermodynamic parameters is shown in Figure A6 and Table A10. The determined thermodynamic values and trends are qualitatively similar in every case.

$$\text{Population} = \frac{\sum \Delta \delta H_{\alpha}(1) - \sum \Delta \delta H_{\alpha}(2)}{\sum \Delta \delta H_{\alpha}(3) - \sum \Delta \delta H_{\alpha}(2)}$$

$$= \frac{e^{((T(\Delta S_{298}^o + \Delta C_p^o \ln(T/298)) - (\Delta H_{298}^o + \Delta C_p^o \ln(T - 298))) / RT)}}{1 + e^{((T(\Delta S_{298}^o + \Delta C_p^o \ln(T/298)) - (\Delta H_{298}^o + \Delta C_p^o \ln(T - 298))) / RT)}}$$

**Figure A4:** Van't Hoff equation used to determine thermodynamic parameters of folding based upon population change with temperature. Adapted from Maynard, A. J.; Sharman, G. J.; Searle, M. S. *J. Am. Chem. Soc.* 1998, 120, 1996-2007. Non-linear regression fitting was performed using the program sigma plot.

Figure A5:

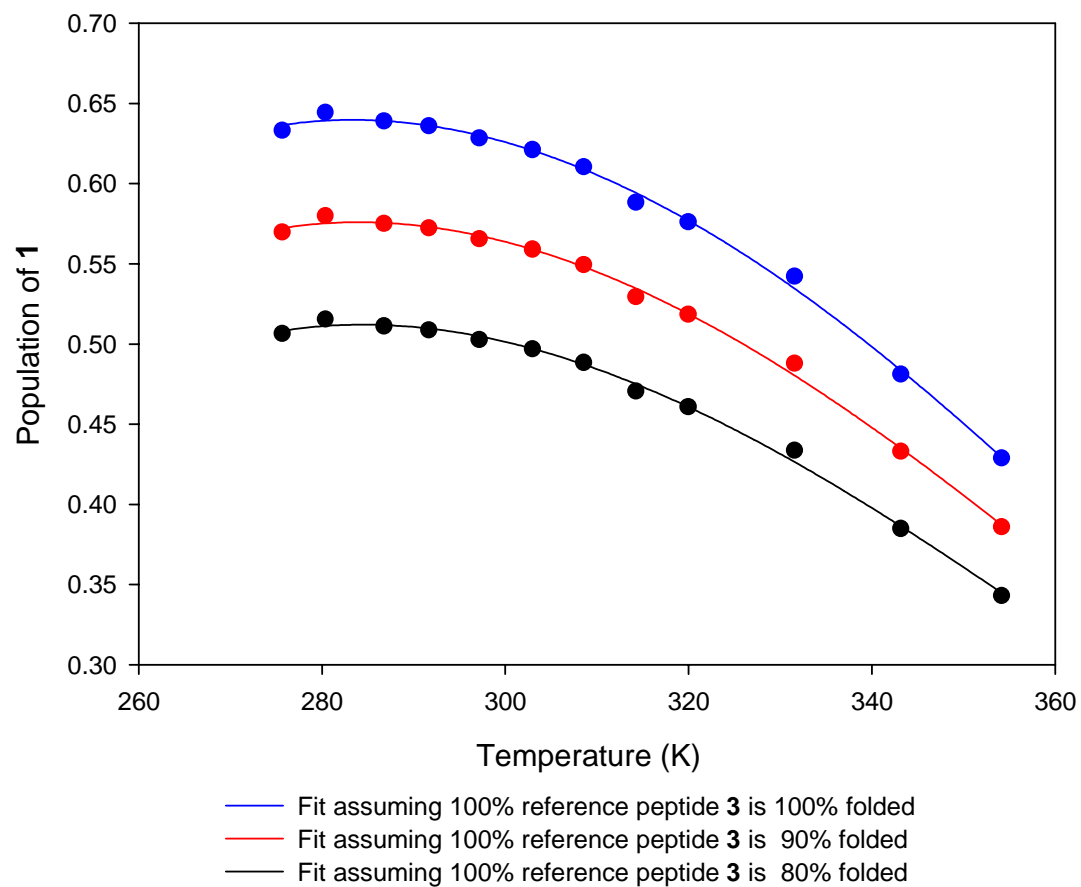**Table A9:** Thermodynamic parameters obtained from the fits in figure A5

|                                                      | Calculated thermodynamic parameters assuming reference peptide <b>3</b> is 100% folded (Fit reported in text) | Calculated thermodynamic parameters assuming reference peptide <b>3</b> is 90% folded | Calculated thermodynamic parameters assuming reference peptide <b>3</b> is 80% folded |
|------------------------------------------------------|---------------------------------------------------------------------------------------------------------------|---------------------------------------------------------------------------------------|---------------------------------------------------------------------------------------|
| $\Delta H$ (kcal mol <sup>-1</sup> )                 | - 1.1                                                                                                         | - 0.9                                                                                 | - 0.8                                                                                 |
| $\Delta S$ (cal mol <sup>-1</sup> °K <sup>-1</sup> ) | - 2.6                                                                                                         | - 2.6                                                                                 | - 2.7                                                                                 |
| $\Delta C_p$ (cal mol <sup>-1</sup> )                | - 73                                                                                                          | - 67                                                                                  | - 61                                                                                  |
| Initial fraction folded                              | 0.63                                                                                                          | 0.57                                                                                  | 0.51                                                                                  |
| $\Delta$ fraction folded from 276 to 354 °K          | - 0.20                                                                                                        | -0.18                                                                                 | -0.16                                                                                 |

Figure A6:

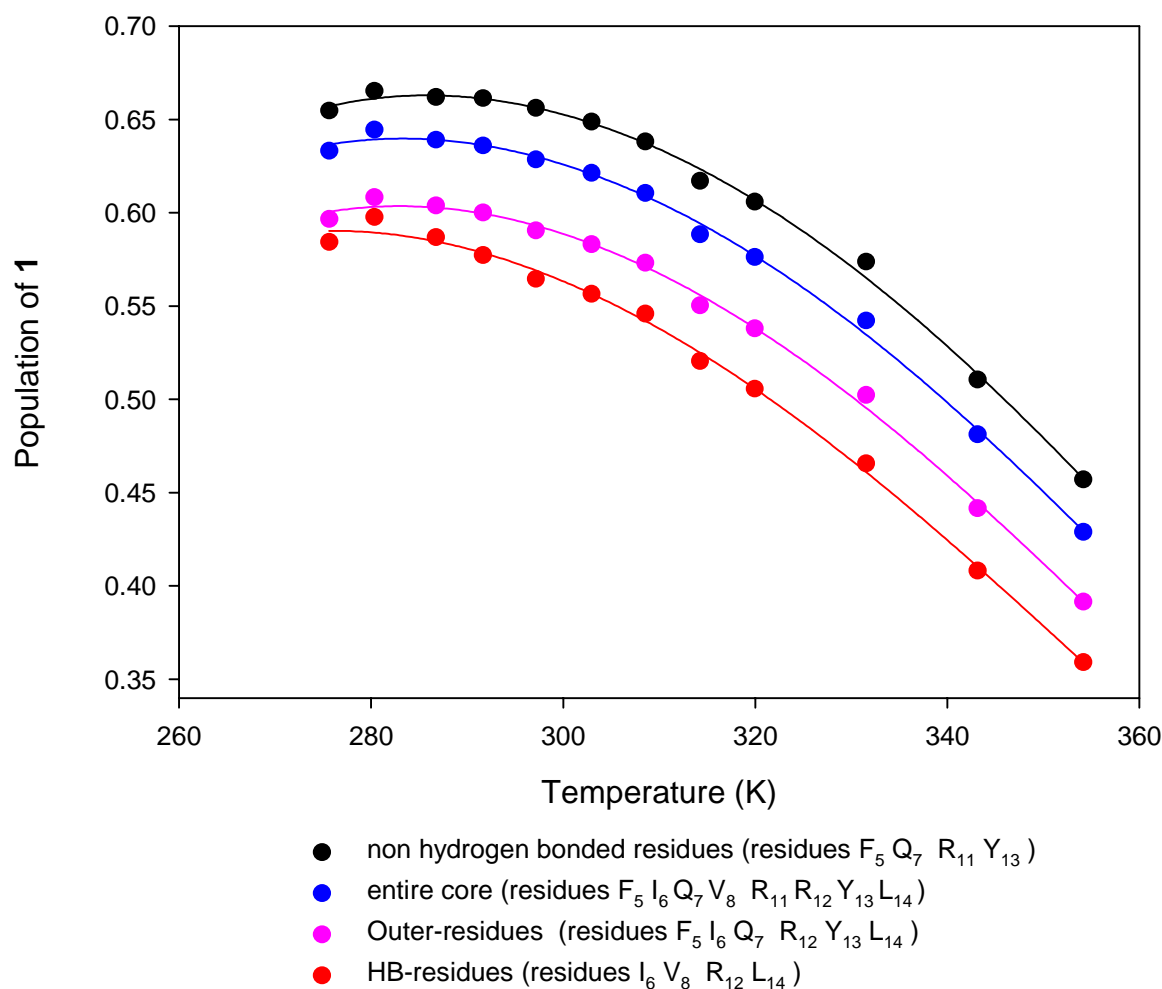**Table A10:** Derived thermodynamic parameters for peptide **1** using subsets of residues in the calculations .

| Subset of residue used in fitting procedure                                                                                                                                                                                               | $\Delta H_{298}^{\circ}$<br>kcal /mol | $\Delta S_{298}^{\circ}$<br>cal /mol K | $C_p^{\circ}$<br>cal /mol K |
|-------------------------------------------------------------------------------------------------------------------------------------------------------------------------------------------------------------------------------------------|---------------------------------------|----------------------------------------|-----------------------------|
| Entire Core<br>(residues F <sub>5</sub> I <sub>6</sub> Q <sub>7</sub> V <sub>8</sub> R <sub>11</sub> R <sub>12</sub> Y <sub>13</sub> L <sub>14</sub> )                                                                                    | -1.1 ± 0.1                            | -2.5 ± 0.2                             | -73 ± 2                     |
| Non hydrogen bonded residues<br>(residues F <sub>5</sub> Q <sub>7</sub> R <sub>11</sub> Y <sub>13</sub> )                                                                                                                                 | -1.0 ± 0.1                            | -1.9 ± 0.2                             | -78 ± 2                     |
| Hydrogen bonded residues<br>(residues I <sub>6</sub> V <sub>8</sub> R <sub>12</sub> L <sub>14</sub> )                                                                                                                                     | -1.4 ± 0.1                            | -4.3 ± 0.2                             | -66 ± 2                     |
| Omitting residues adjacent to <sup>D</sup> Pro-dadme turn<br>(residues F <sub>5</sub> I <sub>6</sub> Q <sub>7</sub> R <sub>12</sub> Y <sub>13</sub> L <sub>14</sub> ; entire core omitting<br>residues V <sub>8</sub> , R <sub>11</sub> ) | -1.1 ± 0.1                            | -2.9 ± 0.2                             | -73 ± 2                     |
